# Supplementary material for: Oxygen vacancies confined in hierarchically porous CsPbBr3@Pb-MOF through in situ structural transformation for promoting photocatalytic CO2 reduction
Source: Royal Society of Chemistry journal article supplement (doi:10.1039/d3qi00596h), 2023-01-01
Supplement: d3qi00596h1.pdf [file d3qi00596h1.pdf]

## Oxygen vacancies confined in hierarchically porous CsPbBr<sub>3</sub>@Pb-MOF through in situ structural transformation for promoted photocatalytic CO<sub>2</sub> reduction

Yangwen Hou<sup>a</sup>, Man Dong<sup>c</sup>, Jingting He<sup>a</sup>, Jing Sun<sup>b</sup>, Chunyi Sun<sup>c,\*</sup>, Xiao Li<sup>b</sup>, Xinlong Wang<sup>c</sup>, Zhongmin Su<sup>b,d,\*</sup>

<sup>a</sup>School of Materials Science and Engineering, Changchun University of Science and Technology, Changchun 130022, China

<sup>b</sup>Jilin Provincial Science and Technology Innovation Center of Optical Materials and Chemistry, School of Chemistry and Environmental Engineering, Changchun University of Science and Technology Changchun, Changchun, 130022 Jilin, China

<sup>c</sup>Key Laboratory of Polyoxometalate Science of Ministry of Education, Northeast Normal University, Changchun, 130024 Jilin, China

<sup>d</sup>State Key Laboratory of Supramolecular Structure and Materials, Institute of Theoretical Chemistry, College of Chemistry, Jilin University, Changchun 130021, China

\* Corresponding author.

E-mail addresses: suncy009@nenu.edu.cn (C. Sun), zmsu@nenu.edu.cn (Z. Su).

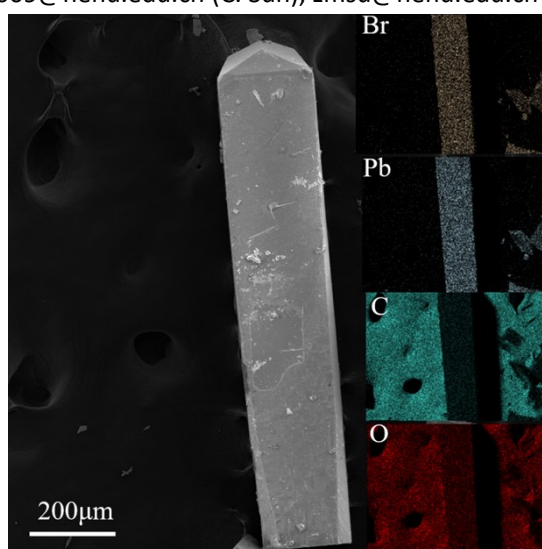

Fig.S1. SEM image and EDX mapping of PbBr-MOF

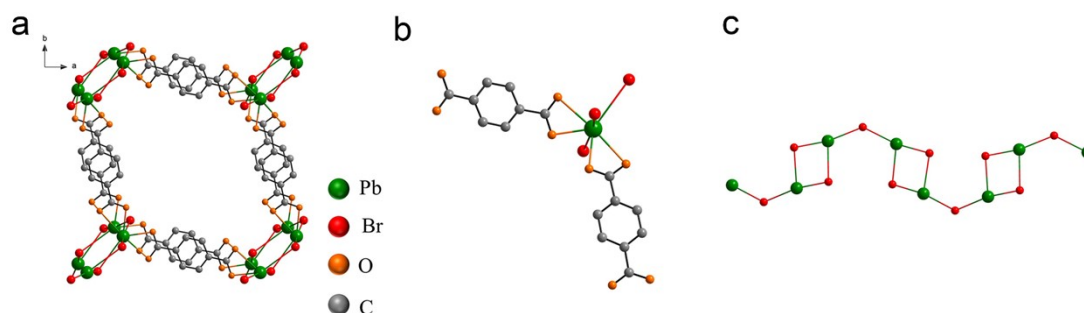

Fig. S2. Crystallographic view of (a) a single net of PbBr-MOF, (b) Coordination environment of the Pb(II) atom, (c) single [Pb<sub>2</sub>Br<sub>3</sub>]<sup>+</sup>.

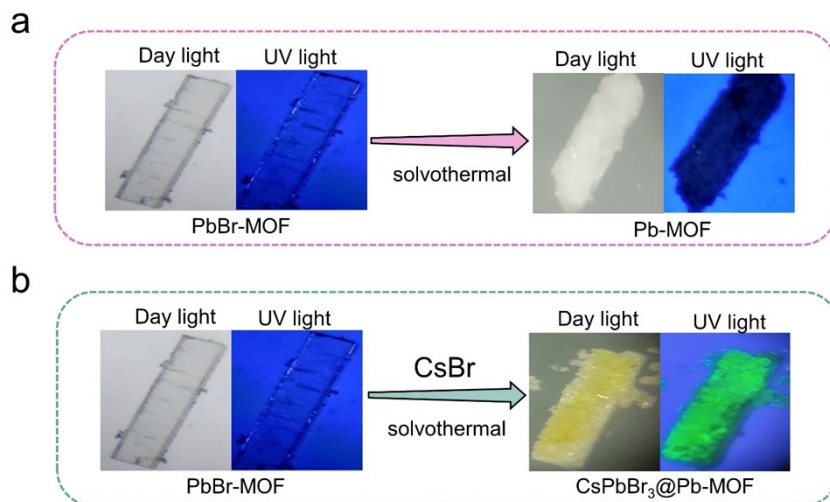

Fig. S3. Photographs of (a) PbBr-MOF and Pb-MOF, (b) PbBr-MOF and CsPbBr<sub>3</sub>@Pb-MOF under daylight and UV light (365 nm).

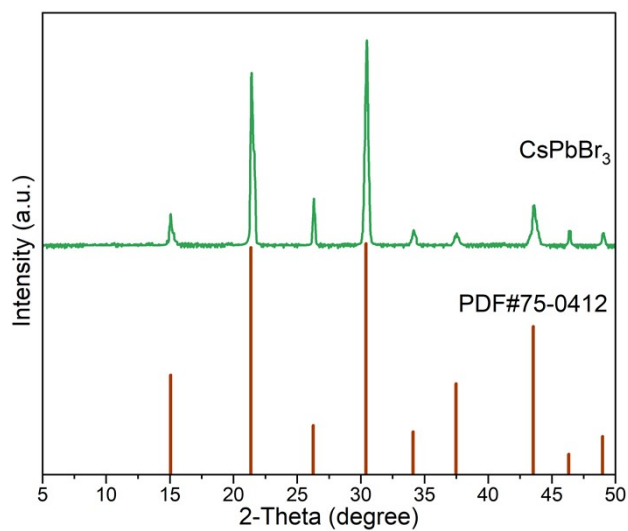

Fig. S4. PXRD pattern of CsPbBr<sub>3</sub>.

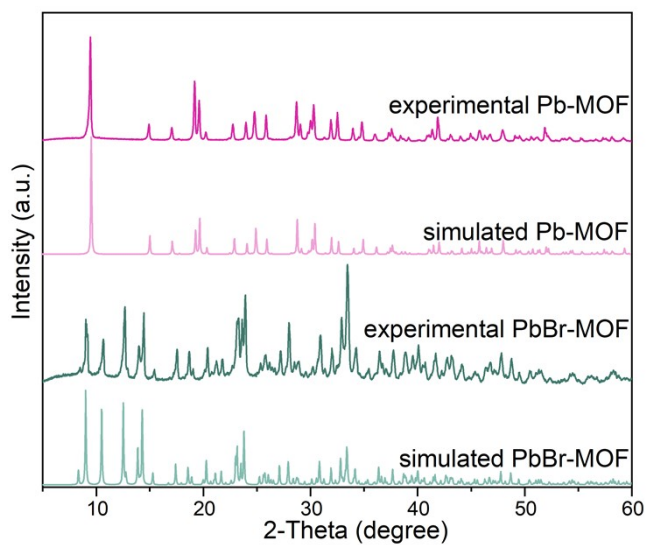

Fig. S5. PXRD pattern of PbBr-MOF and Pb-MOF.

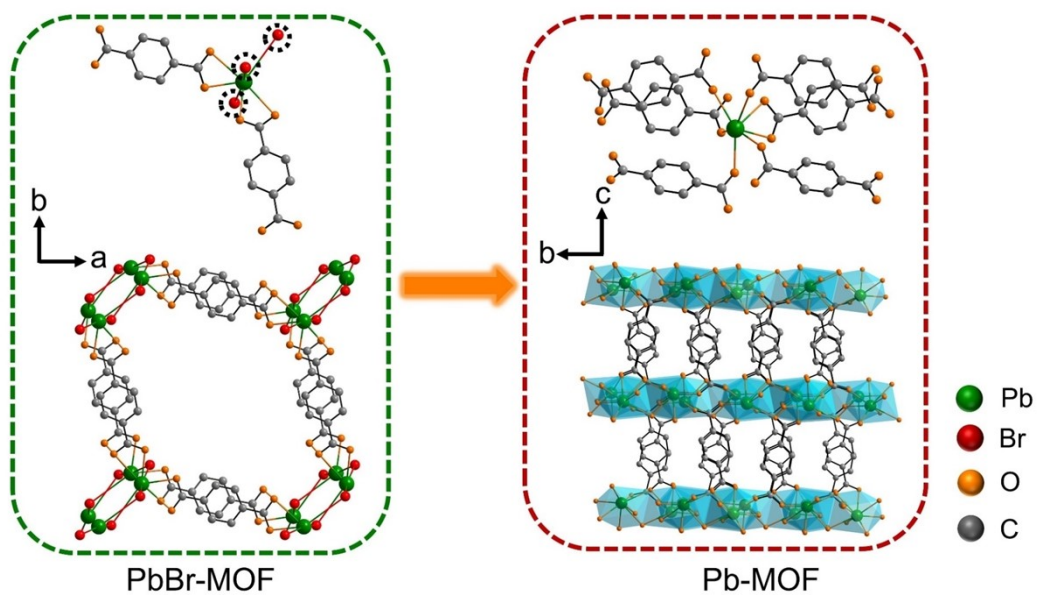

Fig. S6. Crystal structure of PbBr-MOF (left) and Pb-MOF (right)

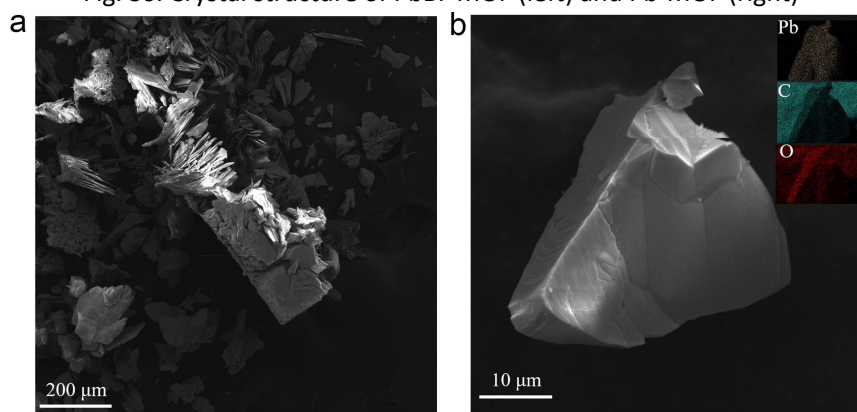

Fig. S7. SEM image and EDX mapping of Pb-MOF.

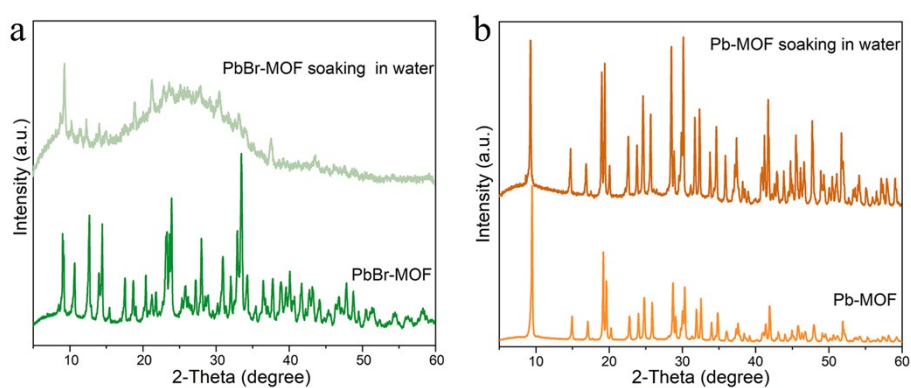

Fig. S8. PXRD patterns of (a)PbBr-MOF and (b) Pb-MOF after water immersion.

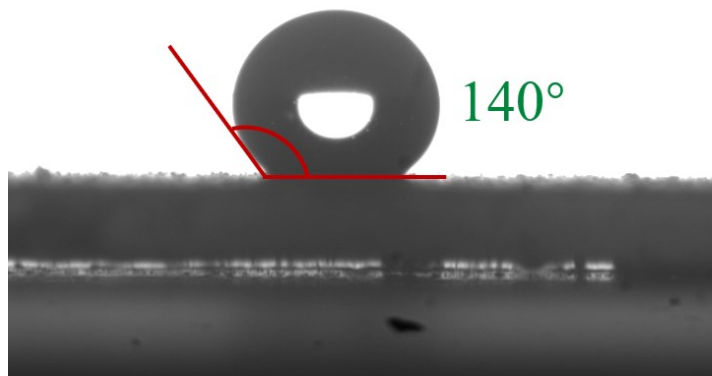

Fig. S9. Water contact angles of Pb-MOF.

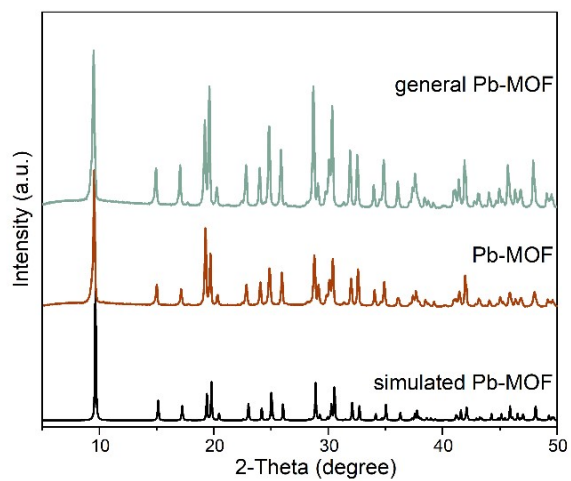

Fig. S10. PXRD pattern of Pb-MOF and general Pb-MOF.

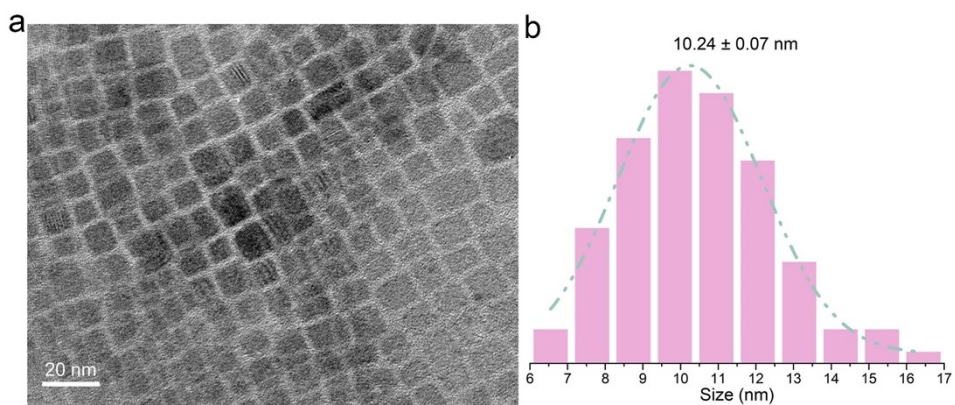

Fig. S11. (a) TEM image and particle size distributions of CsPbBr<sub>3</sub>.

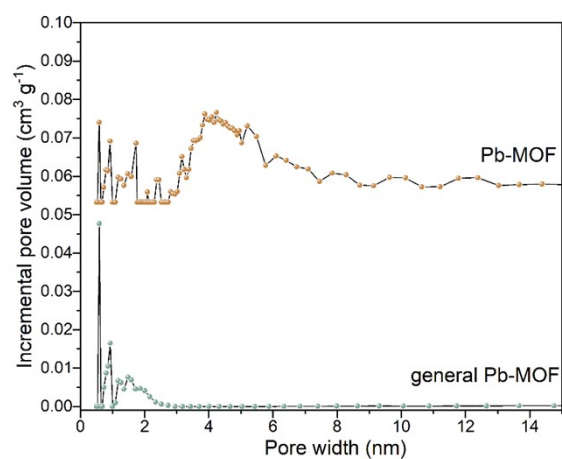

Fig. S12. Pore size distributions based on density-functional theory (DFT) analysis of Pb-MOF and general Pb-MOF.

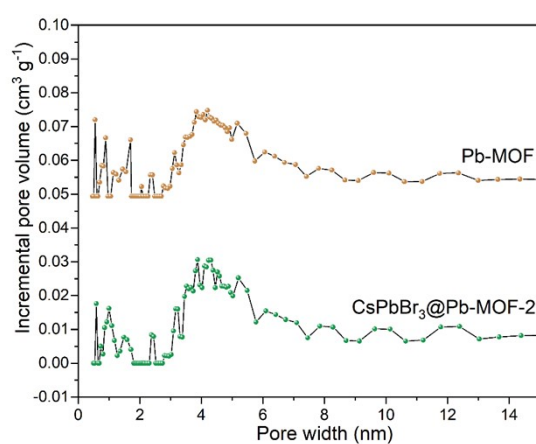

Fig. S13. Pore size distributions based on density-functional theory (DFT) analysis of Pb-MOF and CsPbBr<sub>3</sub>@Pb-MOF-2.

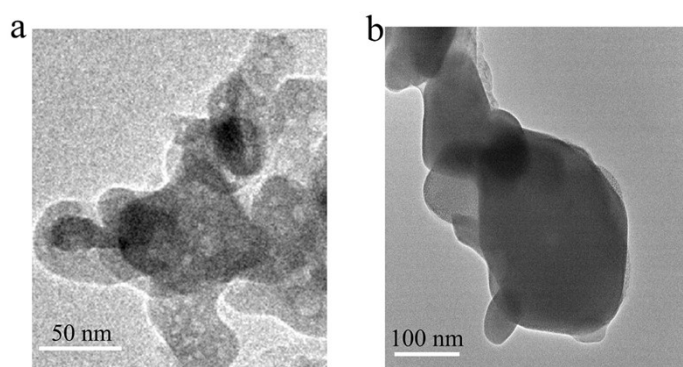

Fig. S14. TEM image of (a) Pb-MOF and (b) general Pb-MOF.

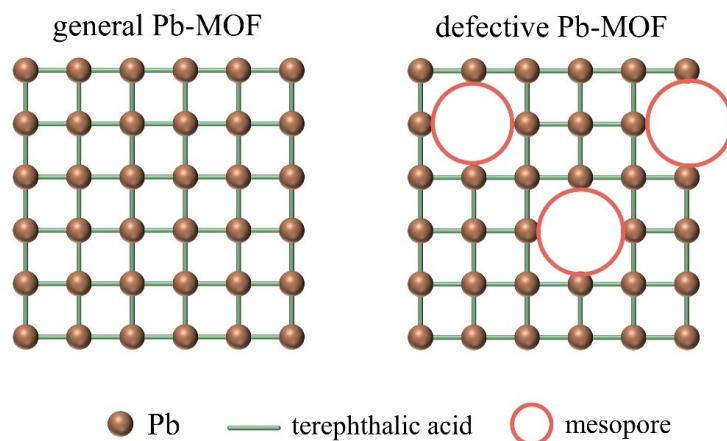

Fig. S15. Schematic showing the conversion of microporous MOFs into corresponding hierarchically porous structures based on the structural transformation.

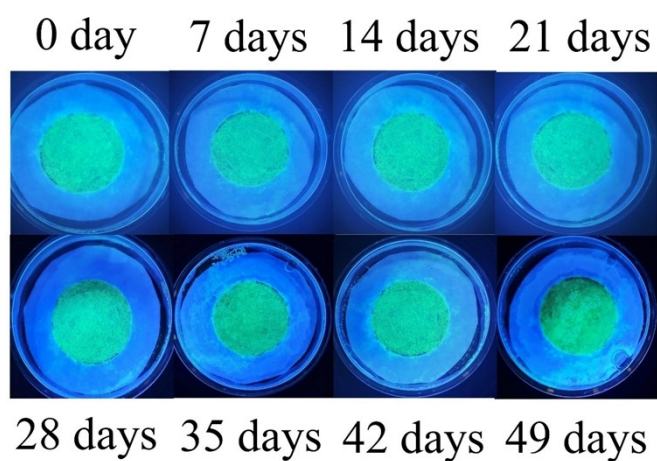

Fig. S16. Photographs of CsPbBr<sub>3</sub>@Pb-MOF-2 in water under 365 nm UV light.

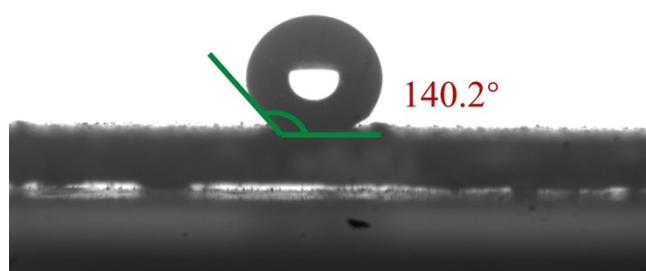

Fig. S17. Water contact angles of CsPbBr<sub>3</sub>@Pb-MOF-2.

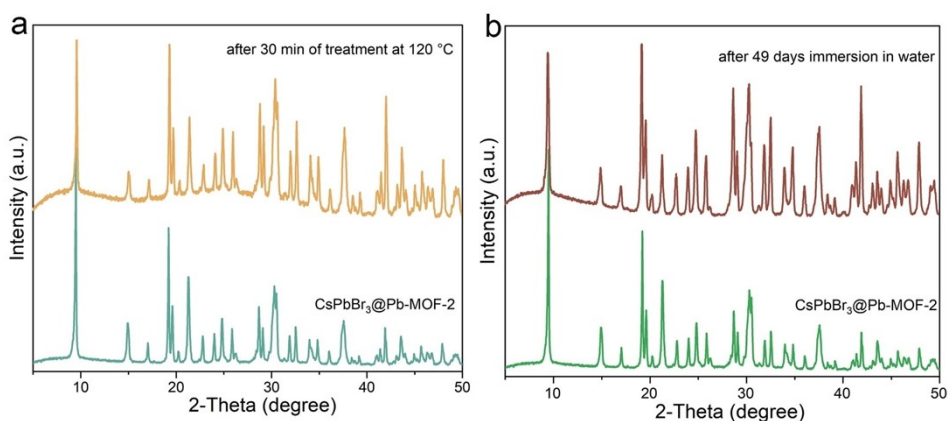

Fig. S18 XRD pattern of CsPbBr<sub>3</sub>@Pb-MOF-2 (a) after 49 days immersion in water and (b) after 30 min of treatment at 120 °C.

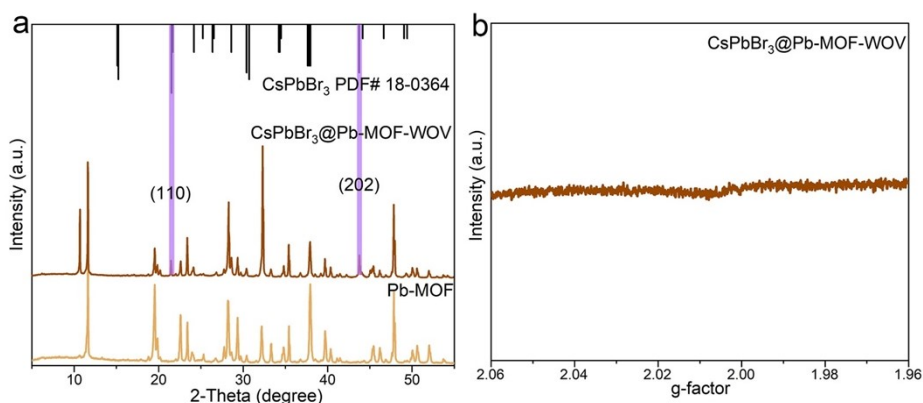

Fig. S19 (a) XRD pattern of CsPbBr<sub>3</sub>@Pb-MOF-WOV. (b) Electron paramagnetic resonance spectra of CsPbBr<sub>3</sub>@Pb-MOF-WOV.

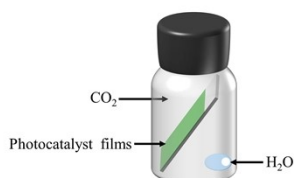

Fig. S20. Schematic of experimental set-up for photocatalytic CO<sub>2</sub> reduction with the assistance of H<sub>2</sub>O.

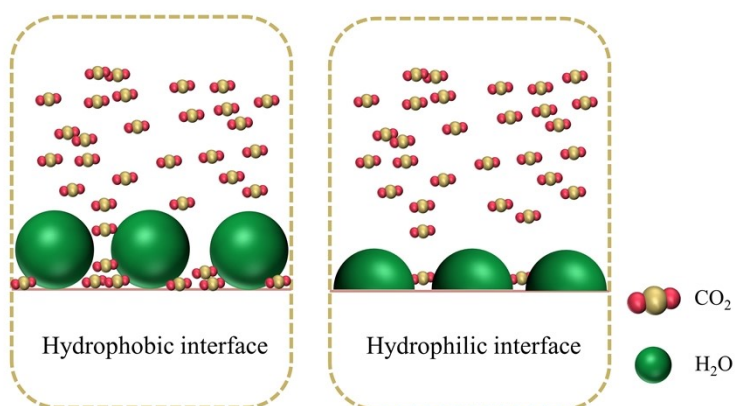

Fig. S21. The proposed photocatalytic reaction mechanism on the CsPbBr<sub>3</sub>@Pb-MOF system for high selective.

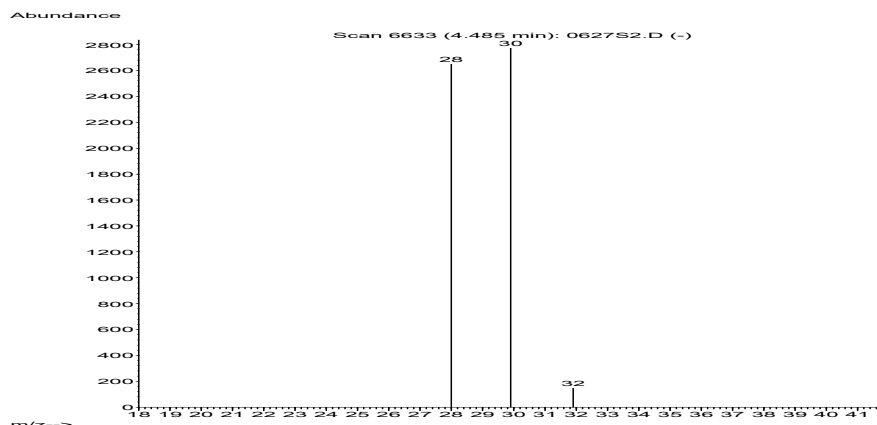

Fig.S22 Mass spectra of photocatalytic products generated in the atmosphere of  $\text{CO}_2$  and  $\text{H}_2^{18}\text{O}$  on  $\text{CsPbBr}_3@ \text{Pb-MOF}$ .

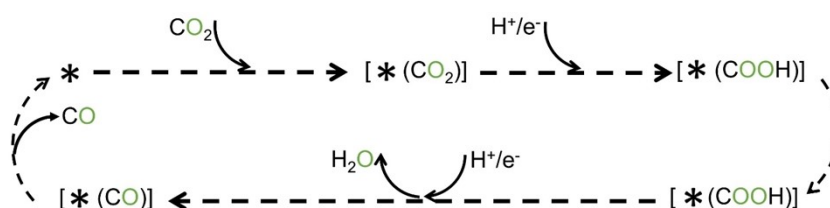

Fig.23 Schematic representation of the reduction of  $\text{CO}_2$  to  $\text{CO}$ . where “\*” represents the corresponding adsorption sites on the surface of the photocatalyst.

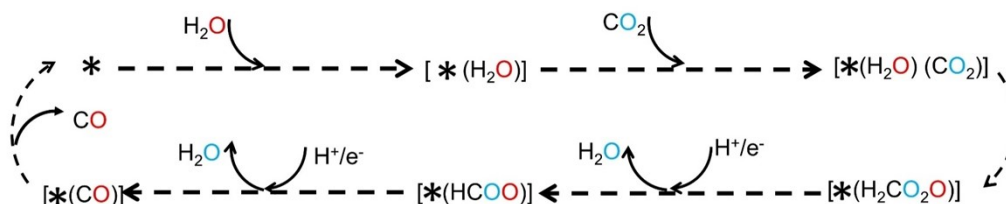

Fig.24 Schematic representation of the reduction of  $\text{CO}_2$  to  $\text{CO}$ . where “\*” represents the corresponding adsorption sites on the surface of the photocatalyst.

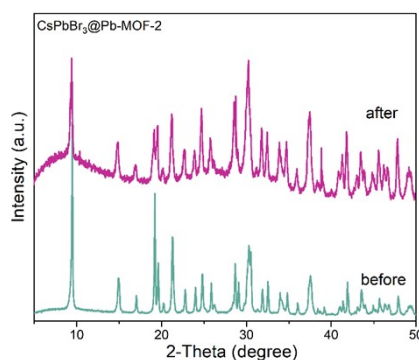

Fig. S25. PXRD pattern of  $\text{CsPbBr}_3@ \text{Pb-MOF-2}$  after 48h photocatalytic reduction  $\text{CO}_2$  reaction cycles.



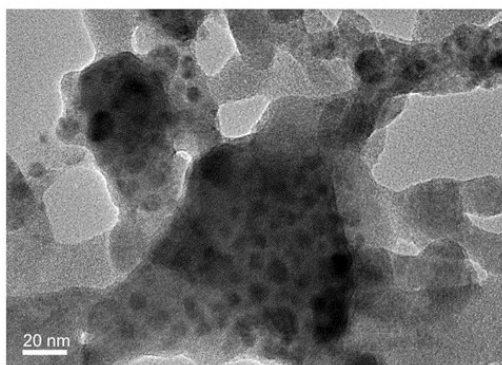

Fig. S26. TEM of CsPbBr<sub>3</sub>@Pb-MOF-2 after 48h photocatalytic reduction CO<sub>2</sub> reaction cycles.

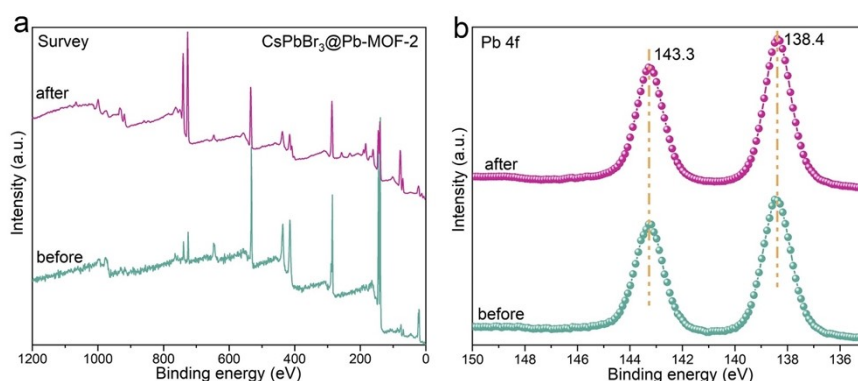

Fig. S27. XPS of CsPbBr<sub>3</sub>@Pb-MOF-2 before and after 48h photocatalytic reduction CO<sub>2</sub> reaction cycles.

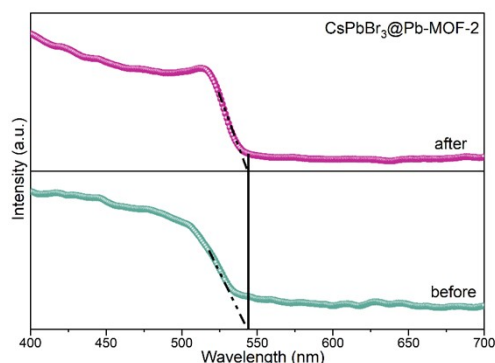

Fig. S28. UV-vis diffuse reflectance spectra of CsPbBr<sub>3</sub>@Pb-MOF-2 before and after 48h photocatalytic reduction CO<sub>2</sub> reaction cycles.

Table S1. Time-resolved PL decay parameters of different samples under 365 nm excitation. The two-exponential decay curves were fitted using a non-linear least-squares method with a two-component decay law. The average lifetime ( $\tau_{av}$ ) was then determined using the equation:

| Sample                        | $\tau_1$ (ns)    | $A_1$ | $\tau_2$ (ns)    | $A_2$ | $\chi^2$ | $\tau_{av}$ (ns) |
|-------------------------------|------------------|-------|------------------|-------|----------|------------------|
| CsPbBr <sub>3</sub>           | 19.50<br>(23.8%) | 15.59 | 81.57<br>(76.2%) | 11.95 | 1.089    | 66.8             |
| CsPbBr <sub>3</sub> @Pb-MOF-2 | 3.82<br>(53.9%)  | 356.1 | 22.16<br>(46.1%) | 52.46 | 1.019    | 12.3             |

$$\tau = \frac{\sum_{i=1}^{i=n} A_i \tau_i^2}{\sum_{i=1}^{i=n} A_i \tau_i}$$

Table S2. CO of selectivity of photocatalysts.

| Photocatalyst                   | CO ( $\mu\text{mol g}^{-1}$ ) | H <sub>2</sub> ( $\mu\text{mol g}^{-1}$ ) | Selectivity(%) |
|---------------------------------|-------------------------------|-------------------------------------------|----------------|
| CsPbBr <sub>3</sub> @Pb-MOF-1   | 352.3                         | n.d.                                      | 100            |
| CsPbBr <sub>3</sub> @Pb-MOF-2   | 1284                          | 10.1                                      | 99.2           |
| CsPbBr <sub>3</sub> @Pb-MOF-3   | 1066                          | 8.7                                       | 99.2           |
| CsPbBr <sub>3</sub> @Pb-MOF-WOV | 221                           | 22.7                                      | 90             |
| CsPbBr <sub>3</sub>             | 149                           | 20.3                                      | 88             |
| Pb-MOF                          | n.d.                          | n.d.                                      |                |

Reaction conditions: Photocatalyst (10 mg), reductant (H<sub>2</sub>O, 100  $\mu\text{L}$ ), CO<sub>2</sub> (1 atm),  $\lambda > 420$  nm, 12 hours reaction time; n.d. = Not detectable; Selectivity =  $(n(\text{CO})) / (n(\text{CO}) + n(\text{H}_2)) * 100\%$ , where n(CO) was the amount of CO ( $\text{mol g}^{-1}$ ).

Table S3. Summary of perovskite-based photocatalysts for CO<sub>2</sub> reduction in gas-solid phase and liquid-solid phase.

| Photocatalyst                                                          | Products ( $\mu\text{mol g}^{-1} \text{h}^{-1}$ ) | Reaction agent                   | Light source                       | Ref       |
|------------------------------------------------------------------------|---------------------------------------------------|----------------------------------|------------------------------------|-----------|
| CsPbBr <sub>3</sub> @Pb-MOF                                            | CO (107)                                          | H <sub>2</sub> O                 | 300W Xe-lamp ( $\lambda > 420$ nm) | This work |
| CsPbBr <sub>3</sub> @ZIF-8                                             | CO (0.505) CH <sub>4</sub> (1.811)                | H <sub>2</sub> O                 | 100W Xe-lamp (AM, 1.5G)            | 1         |
| CsPbBr <sub>3</sub> @ZIF-67                                            | CO (0.767) CH <sub>4</sub> (3.512)                | H <sub>2</sub> O                 | 100W Xe-lamp (AM, 1.5G)            | 1         |
| CsPbBr <sub>3</sub> /MIL-100(Fe)                                       | CO (20.4)                                         | H <sub>2</sub> O                 | 300W Xe-lamp                       | 2         |
| CsPbBr <sub>3</sub> NC/BZNW/MRGO                                       | CO (0.58) CH <sub>4</sub> (6.29)                  | H <sub>2</sub> O                 | 150W Xe-lamp ( $\lambda > 420$ nm) | 3         |
| $\alpha$ -Fe <sub>2</sub> O <sub>3</sub> /AmineRGO/CsPbBr <sub>3</sub> | CO (2.36) CH <sub>4</sub> (9.45)                  | H <sub>2</sub> O                 | 150W Xe-lamp (AM, 1.5G)            | 4         |
| CsPbBr <sub>3</sub> /Pd-NS                                             | CO (1.92) CH <sub>4</sub> (3.47)                  | H <sub>2</sub> O                 | 150W Xe-lamp ( $\lambda > 420$ nm) | 5         |
| CsPbBr <sub>3</sub> -Glycine                                           | CO (27.7)                                         | H <sub>2</sub> O                 | 300W Xe-lamp ( $\lambda > 400$ nm) | 6         |
| CsPbBr <sub>3</sub> -GO-1.5                                            | CH <sub>4</sub> (18.6)                            | H <sub>2</sub> O                 | 500W Xe-lamp ( $\lambda > 400$ nm) | 7         |
| Pb-rich Ni: CsPbCl <sub>3</sub>                                        | CO (169.37)                                       | H <sub>2</sub> O                 | 300W Xe-lamp (AM, 1.5G)            | 8         |
| CsPbBr <sub>3</sub> QDs@UiO-66 (NH <sub>2</sub> )                      | CO (8.21) CH <sub>4</sub> (0.26)                  | H <sub>2</sub> O / Ethyl acetate | 300W Xe-lamp ( $\lambda > 420$ nm) | 9         |
| MAPbI <sub>3</sub> @PCN-221(Fe0.2)                                     | CO (4.16) CH <sub>4</sub> (13)                    | H <sub>2</sub> O / Ethyl acetate | 300W Xe-lamp ( $\lambda > 400$ nm) | 10        |
| MAPbI <sub>3</sub> @PCN-221(Fe)                                        | CO (14.16) CH <sub>4</sub> (6.24)                 | H <sub>2</sub> O / Ethyl acetate | 300W Xe-lamp ( $\lambda > 400$ nm) | 10        |
| MF/CPB-NWs                                                             | CO (81)                                           | H <sub>2</sub> O / Ethyl acetate | 300W Xe-lamp ( $\lambda > 420$ nm) | 11        |
| CsPbBr <sub>3</sub> /BIF-122-Co                                        | CO (0.005) CH <sub>4</sub> (0.005)                | H <sub>2</sub> O / Ethyl acetate | 300W Xe-lamp ( $\lambda > 420$ nm) | 12        |
| CPB@Cu-TCPP-20                                                         | CO (71.11) CH <sub>4</sub> (0.82)                 | Acetonitrile                     | 300W Xe-lamp ( $\lambda > 420$ nm) | 13        |
| CsPbBr <sub>3</sub> @g-C <sub>3</sub> N <sub>4</sub> -NH <sub>2</sub>  | CO (148.9)                                        | H <sub>2</sub> O / Ethyl acetate | 300W Xe-lamp ( $\lambda > 420$ nm) | 14        |

## References

- [1] Z.-C. Kong, J.-F. Liao, Y.-J. Dong, Y.-F. Xu, H.-Y. Chen, D.-B. Kuang, C.-Y. Su, Core@shell CsPbBr<sub>3</sub>@Zeolitic imidazolate framework nanocomposite for efficient photocatalytic CO<sub>2</sub> reduction, *ACS Energy Lett.*, 2018, **3**, 2656–2662.
- [2] R. Cheng, E. Debroye, J. Hofkens, M.B.J. Roeflaers, Efficient photocatalytic CO<sub>2</sub> reduction with MIL-100 (Fe)-CsPbBr<sub>3</sub> composites, *Catalysts*, 2020, **10**, 1352.
- [3] Y. Jiang, J.-F. Liao, Y.-F. Xu, H.-Y. Chen, X.-D. Wang, D.-B. Kuang, Hierarchical CsPbBr<sub>3</sub> nanocrystal-decorated ZnO nanowire/macroporous graphene hybrids for enhancing charge separation and photocatalytic CO<sub>2</sub> reduction, *J. Mater. Chem. A.*, 2019, **7**, 13762–13769.
- [4] Y. Jiang, J.-F. Liao, H.-Y. Chen, H.-H. Zhang, J.-Y. Li, X.-D. Wang, D.-B. Kuang, All-solid-state Z-scheme  $\alpha$ -Fe<sub>2</sub>O<sub>3</sub>/Amine-RGO/CsPbBr<sub>3</sub> hybrids for visible-light-driven photocatalytic CO<sub>2</sub> reduction, *Chem*, 2020, **6**, 766–780.

- [5] Y.-F. Xu, M.-Z. Yang, H.-Y. Chen, J.-F. Liao, X.-D. Wang, D.-B. Kuang, Enhanced Solar-Driven Gaseous CO<sub>2</sub> Conversion by CsPbBr<sub>3</sub> Nanocrystal/Pd Nanosheet Schottky-Junction Photocatalyst, *ACS Appl. Energy Mater.*, 2018, **1**, 5083–5089.
- [6] Y. Xu, W. Zhang, K. Su, Y.-X. Feng, Y.-F. Mu, M. Zhang, T.-B. Lu, Glycine-functionalized CsPbBr<sub>3</sub> nanocrystals for efficient visible-light photocatalysis of CO<sub>2</sub> reduction, *Chem. – Eur. J.*, 2021, **27**, 2305–2309.
- [7] Y.-H. Chen, J.-K. Ye, Y.-J. Chang, T.-W. Liu, Y.-H. Chuang, W.-R. Liu, S.-H. Liu, Y.-C. Pu, Mechanisms behind photocatalytic CO<sub>2</sub> reduction by CsPbBr<sub>3</sub> perovskite-graphene-based nanoheterostructures, *Appl. Catal. B Environ.*, 2021, **284**, 119751.
- [8] J. Zhu, Y. Zhu, J. Huang, L. Hou, J. Shen, C. Li, Synthesis of monodisperse water-stable surface Pb-rich CsPbCl<sub>3</sub> nanocrystals for efficient photocatalytic CO<sub>2</sub> reduction, *Nanoscale*, 2020, **12**, 11842–11846.
- [9] S. Wan, M. Ou, Q. Zhong, X. Wang, Perovskite-type CsPbBr<sub>3</sub> quantum dots/UiO-66(NH<sub>2</sub>) nanojunction as efficient visible-light-driven photocatalyst for CO<sub>2</sub> reduction, *Chem. Eng. J.*, 2019, **358**, 1287–1295.
- [10] L.-Y. Wu, Y.-F. Mu, X.-X. Guo, W. Zhang, Z.-M. Zhang, M. Zhang, T.-B. Lu, Encapsulating Perovskite Quantum Dots in Iron-Based Metal–Organic Frameworks (MOFs) for Efficient Photocatalytic CO<sub>2</sub> Reduction, *Angew. Chem. Int. Ed.*, 2019, **58**, 9491–9495.
- [11] Y. Xi, X. Zhang, Y. Shen, W. Dong, Z. Fan, K. Wang, S. Zhong, S. Bai, Aspect ratio dependent photocatalytic enhancement of CsPbBr<sub>3</sub> in CO<sub>2</sub> reduction with two-dimensional metal organic framework as a cocatalyst, *Appl. Catal. B Environ.*, 2021, **297**, 120411.
- [12] Z.-Y. Chen, Q.-L. Hong, H.-X. Zhang, J. Zhang, Composite of CsPbBr<sub>3</sub> with Boron Imidazolate Frameworks as an Efficient Visible-Light Photocatalyst for CO<sub>2</sub> Reduction, *ACS Appl. Energy Mater.*, 2022, **5**, 1175–1182.
- [13] N. Zhang, J.-J. Li, Y. Li, H. Wang, J.-Y. Zhang, Y. Liu, Y.-Z. Fang, Z. Liu, M. Zhou, Visible-light driven boosting electron-hole separation in CsPbBr<sub>3</sub> QDs@2D Cu-TCPP heterojunction and the efficient photoreduction of CO<sub>2</sub>, *J. Colloid Interface Sci.*, 2022, **608**, 3192–3203.
- [14] M. Ou, W. Tu, S. Yin, W. Xing, S. Wu, H. Wang, S. Wan, Q. Zhong, R. Xu, Amino-Assisted Anchoring of CsPbBr<sub>3</sub> Perovskite Quantum Dots on Porous g-C<sub>3</sub>N<sub>4</sub> for Enhanced Photocatalytic CO<sub>2</sub> Reduction, *Angew. Chem.*, 2018, **130**, 13758–13762.
